# Supplementary material
Source: Springer Nature journal article supplement (https://www.springermedizin.de/resource/supplementary/12885_2014_4557_MOESM1_ESM.pdf/9466626)

■ Responders ■ Non-responders

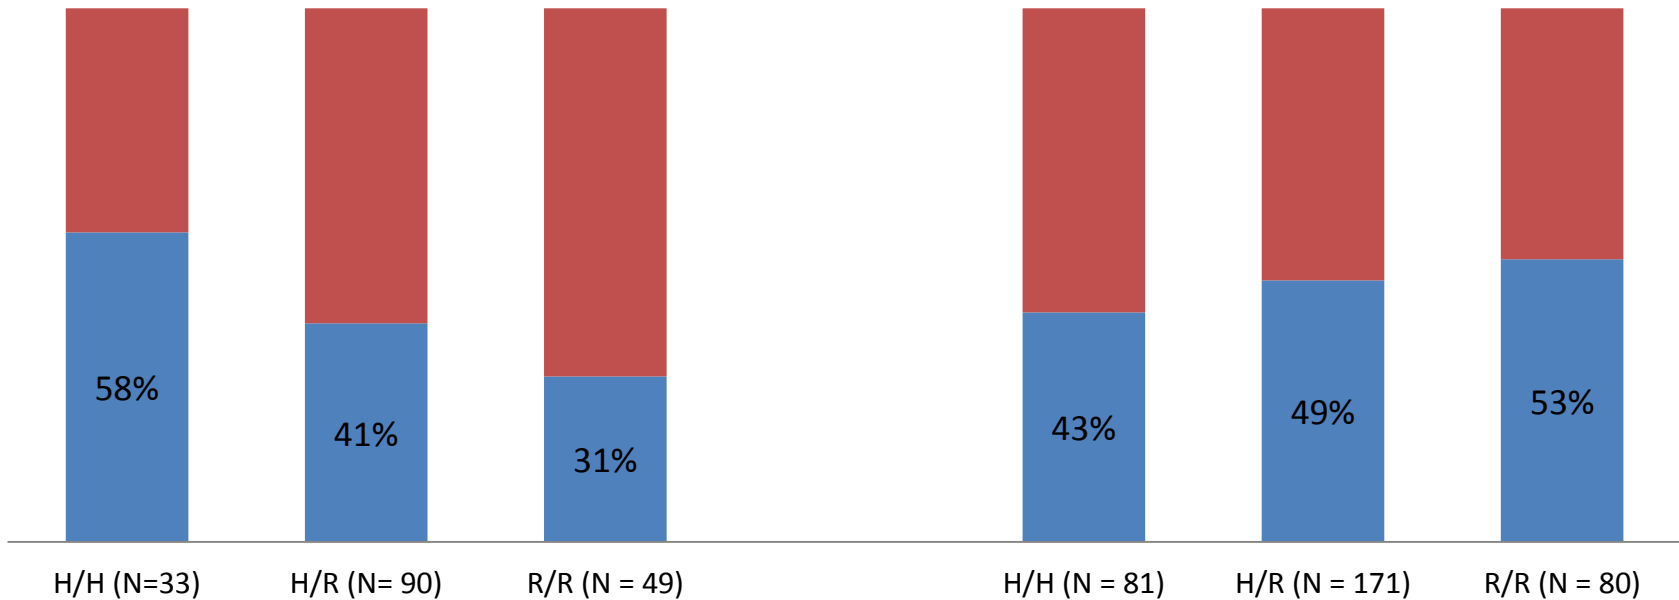

**FLOX**

**FLOX + cetuximab**

Supplement: MOESM1 [file 9466626]
